# Supplementary material for: Low regeneration of lesions produced by coring in Orbicella faveolata
Source: PeerJ. 2016 Jan 19;4:e1596. doi: 10.7717/peerj.1596 (PMC4800412; doi:10.7717/peerj.1596)
Supplement: Supplemental Information 1 — Outcome of 50 lesions produced by coring Orbicella faveolata colonies. [file peerj-04-1596-s001.xlsx]

## Sheet: data
Colony original number	Colony number in Fig 3	Lesion	Condition	Date1	Dmax1	Area1	Depth1	Date2	Dmax2	Area2	%change	Overgrowth	Color around	Observations
1	NA	A	YB	2010-09-02	2	3.14	0.82	2015-05-08	NA	NA	NA	NA	NA	Tissue around lesion died due to Yellow-band disease
1	NA	B	YB	2010-09-21	2	3.68	NA	2015-05-08	NA	NA	NA	NA	NA	Tissue around lesion died due to Yellow-band disease
1	1	C	HD	2010-09-02	2	3.23	1.98	2015-05-08	0	0	100	NA	NA	Full recovery
1	1	D	HD	2010-09-21	2	3.53	NA	2015-05-08	0	0	100	NA	NA	Full recovery
2	13	A	H	2010-09-02	2	3.83	1.92	2015-05-08	4.84	4.68	36.7	MTA	Pale	Fusion with lesion B
2	NA	B	H	2010-09-21	2	3.56	NA	2015-05-08	NA	NA	0	MTA	Pale	Fusion with lesion A
3	NA	A	YB	2010-09-02	2	3.14	0.71	2015-05-08	NA	NA	0	NA	NA	Tissue around lesion died due to Yellow-band disease
3	NA	B	YB	2010-09-21	2	3.5	NA	2015-05-08	NA	NA	0	NA	NA	Tissue around lesion died due to Yellow-band disease
5	3	A	HD	2010-09-02	2	3.14	1.91	2015-05-08	1.87	1.12	64.3312	MTA	Normal
5	NA	B	YB	2010-09-02	2	3.99	2.19	2015-05-08	NA	NA	0	NA	NA	Tissue around lesion died due to Yellow-band disease
6	4	A	H	2010-09-21	2.35	4.12	1.4	2015-05-08	4.24	2.31	69.4	MTA	Normal	Fusion with lesion B
6	NA	B	H	2010-09-21	2	3.43	NA	2015-05-08	NA	NA	NA	MTA	Normal	Fusion with lesion A
6	4	C	H	2011-02-15	2	3.68	NA	2015-05-08	1.72	0.71	80.7065	MTA	Normal
7	5	A	H	2010-09-02	2	3.29	1.49	2015-05-08	1.19	1.05	68.0851	MTA	Pale
7	5	B	H	2010-09-21	2	3.6	NA	2015-05-08	2.61	2.79	22.5	MTA	Pale
7	5	C	H	2011-02-15	2	3.58	NA	2015-05-08	1.13	0.87	75.6983	CCA	Pale
8	6	A	H	2010-09-02	2	3.22	1.7	2015-05-08	2.6	2.11	34.472	MTA	Pale
8	6	B	H	2010-09-21	2	3.81	NA	2015-05-08	2.63	2.7	29.1339	MTA	Pale
8	6	C	H	2011-02-15	2	3.54	NA	2015-05-08	1.1	0.7	80.226	CCA	Pale
9	7	A	H	2010-09-02	5.65	15.17	1.58	2015-05-08	2.09	2.33	84.6407	MTA	Pale
9	7	B	H	2010-09-21	4.63	9.29	NA	2015-05-08	1.16	0.8	91.3886	CCA	Pale
9	7	C	H	2011-02-15	2	3.23	NA	2015-05-08	1.27	1.18	63.4675	CCA	Pale
10	NA	A	H	2010-09-02	2	3.51	1.98	2015-05-08	NA	NA	0	NA	NA	Tissue around lesion died due to White-plague disease
10	NA	B	H	2010-09-21	2	3.33	NA	2015-05-08	NA	NA	0	NA	NA	Tissue around lesion died due to White-plague disease
10	NA	C	H	2011-02-15	2	3.82	NA	2015-05-08	NA	NA	0	NA	NA	Tissue around lesion died due to White-plague disease
11	8	A	H	2010-09-02	2	3.48	1.28	2015-05-08	1.08	0.29	91.6667	CCA	Pale
11	8	B	H	2010-09-21	2	4.28	NA	2015-05-08	0.93	0.48	88.785	CCA	Pale
12	9	A	H	2010-09-02	2	3.29	0.9	2015-05-08	1.38	1.58	51.9757	MTA	Pale
12	9	B	H	2010-09-02	2	3.31	1.2	2015-05-08	1.23	0.78	76.435	CCA	Pale
12	9	C	H	2010-09-21	2	4.68	NA	2015-05-08	1.33	0.92	80.3419	MTA	Pale
13	10	A	H	2010-09-21	2	4.01	1.92	2015-05-08	2.13	2.59	35.4115	MTA	Pale
13	10	B	H	2010-09-21	2.31	3.58	NA	2015-05-08	1.66	1.16	67.5978	CCA	Pale
13	10	C	H	2010-09-21	2	3.72	NA	2015-05-08	2.5	1.24	66.6667	MTA	Pale
30	11	A	H	2010-09-01	2	3.94	1.56	2015-05-13	4.55	10.81	-174.4	NA	NA
30	11	B	H	2010-09-23	2	3.53	NA	2015-05-13	5.55	12.29	-43.1	NA	NA	Fusion with lesion C
30	NA	C	H	2011-02-11	2	3.46	NA	2015-05-13	NA	NA	NA	NA	NA	Fusion with lesion B
38	NA	A	HD	2010-09-01	2	3.27	1.86	2015-05-13	NA	NA	NA	NA	NA	Tissue around lesion died
38	NA	B	HD	2010-09-23	2	3.87	NA	2015-05-13	NA	NA	NA	NA	NA	Tissue around lesion died
38	NA	C	HD	2011-02-11	4.95	7.31	NA	2015-05-13	NA	NA	NA	NA	NA	Tissue around lesion died
130	NA	A	YB	2010-09-01	2	4.76	1.43	2015-05-13	NA	NA	NA	NA	NA	Tissue around lesion died due to Yellow-band disease
130	2	B	HD	2010-09-01	2	4.02	0.99	2015-05-13	11.89	78.49	-578.98	NA	NA	Fusion with lesions D and F
130	NA	C	YB	2010-09-23	2	3.81	1.14	2015-05-13	NA	NA	NA	NA	NA	Tissue around lesion died due to Yellow-band disease
130	NA	D	HD	2010-09-23	2	4.4	0.7	2015-05-13	NA	NA	NA	NA	NA	Fusion with lesions B and F
130	NA	E	YB	2011-02-17	2	3.26	0.42	2015-05-13	NA	NA	NA	NA	NA	Tissue around lesion died due to Yellow-band disease
130	NA	F	HD	2011-02-17	2	3.14	NA	2015-05-13	NA	NA	NA	NA	NA	Fusion with lesions B and D
130	NA	G	HD	2011-02-17	2	3.17	NA	2015-05-13	NA	NA	NA	NA	NA	Tissue around lesion died due to Yellow-band disease
131	12	A	H	2010-09-23	2	3.38	0.69	2015-05-13	10.17	40.69	3.78	Falg	Pale	Fusion with lesions B and C
131	NA	B	H	2010-09-23	2	3.73	NA	2015-05-13	NA	NA	NA	Falg	Pale	Fusion with lesions A and C
131	NA	C	H	2011-02-17	2	3.46	NA	2015-05-13	NA	NA	NA	Falg	Pale	Fusion with lesions A and B
131	12	D	H	2011-02-17	2	3.31	NA	2015-05-13	8.14	38.69	-182.41	NA	NA	Fusion with natural lesion

## Sheet: distance
Colony original number	Lesions	Distance	Fusion	Condition
1	A-B	0.3	No fusion	YB-YB
1	A-C	16	No fusion	YB-HD
1	A-D	13.7	No fusion	YB-HD
1	B-C	17.3	No fusion	YB-HD
1	B-D	15	No fusion	YB-HD
1	C-D	1.5	No fusion	HD-HD
2	A-B	0.1	Fusion	H-H
3	A-B	2.5	No fusion	YB-YB
5	A-B	30.4	No fusion	YB-HD
6	A-B	0.6	Fusion	H-H
6	A-C	0.8	No fusion	H-H
6	B-C	1.1	No fusion	H-H
7	A-B	1	No fusion	H-H
7	A-C	5.7	No fusion	H-H
7	B-C	2.8	No fusion	H-H
8	A-B	3.2	No fusion	H-H
8	A-C	1.7	No fusion	H-H
8	B-C	1.9	No fusion	H-H
9	A-B	2.1	No fusion	H-H
9	A-C	3.5	No fusion	H-H
9	B-C	2.8	No fusion	H-H
10	A-B	3.3	No fusion	H-H
10	A-C	7.8	No fusion	H-H
10	B-C	2.6	No fusion	H-H
11	A-B	6.3	No fusion	H-H
12	A-B	4.4	No fusion	H-H
12	A-C	8.2	No fusion	H-H
12	B-C	2.2	No fusion	H-H
13	A-B	2.3	No fusion	H-H
13	A-C	3.9	No fusion	H-H
13	B-C	7.7	No fusion	H-H
30	A-B	2.7	No fusion	H-H
30	A-C	1.1	No fusion	H-H
30	B-C	2.8	Fusion	H-H
38	A-B	1.1	No fusion	HD-HD
38	A-C	2.5	No fusion	HD-HD
38	B-C	2.5	No fusion	HD-HD
130	A-B	9.3	No fusion	YB-HD
130	A-C	0.2	No fusion	YB-YB
130	A-D	6	No fusion	YB-HD
130	A-E	2.1	No fusion	YB-YB
130	A-F	8.2	No fusion	YB-HD
130	A-G	8.3	No fusion	YB-HD
130	B-C	11.7	No fusion	YB-HD
130	B-D	1.1	Fusion	HD-HD
130	B-E	12.6	No fusion	YB-HD
130	B-F	0.2	Fusion	HD-HD
130	B-G	12	No fusion	HD-HD
130	C-D	8.4	No fusion	YB-HD
130	C-E	1	No fusion	YB-YB
130	C-F	10.8	No fusion	YB-HD
130	C-G	11.2	No fusion	YB-HD
130	D-E	9.7	No fusion	YB-HD
130	D-F	0.2	Fusion	HD-HD
130	D-G	11.1	No fusion	HD-HD
130	E-F	11.6	No fusion	YB-HD
130	E-G	8.9	No fusion	YB-HD
130	F-G	12.5	No fusion	HD-HD
131	A-B	3.7	Fusion	H-H
131	A-C	1.6	Fusion	H-H
131	A-D	9.7	No fusion	H-H
131	B-C	1.6	Fusion	H-H
131	B-D	14.6	No fusion	H-H
131	C-D	10.8	No fusion	H-H

## Sheet: codes
Code	Category
NA	No data
H	healthy
HD	healthy-disease
CCA	calcareous coralline algae
Falg	fleshy algae
MTA	mixed turf algae
YB	Yellow-band disease
